# Supplementary material for: Exploring In Vivo Dynamics of Bovine Milk Derived Gangliosides
Source: MDPI journal article supplement (doi:10.3390/nu12030711), 2020-03-07
Supplement: s1 [file s1]

# Exploring in vivo Dynamics of Bovine Milk Derived Gangliosides

Welma Stonehouse<sup>1,\*</sup>, Bradley Klingner<sup>1</sup>, Paul McJarrow<sup>2</sup>, Bertram Fong<sup>2</sup> and Nathan O'Callaghan<sup>1</sup>

## Supplementary Materials

**Table S1.** MS conditions for GM3 ganglioside analysis

| Ganglioside Species    | MRM          | Retention Time (min) |
|------------------------|--------------|----------------------|
| GM <sub>3</sub> (32:1) | 1123.7→290.1 | 2.02                 |
| GM <sub>3</sub> (34:2) | 1149.7→290.1 | 2.13                 |
| GM <sub>3</sub> (34:1) | 1151.7→290.1 | 2.57                 |
| GM <sub>3</sub> (36:2) | 1177.7→290.1 | 2.70                 |
| GM <sub>3</sub> (36:1) | 1179.7→290.1 | 3.20                 |
| GM <sub>3</sub> (38:2) | 1205.8→290.1 | 3.32                 |
| GM <sub>3</sub> (38:1) | 1207.7→290.1 | 3.85                 |
| GM <sub>3</sub> (40:2) | 1233.8→290.1 | 4.00                 |
| GM <sub>3</sub> (40:1) | 1235.8→290.1 | 4.70                 |
| GM <sub>3</sub> (42:2) | 1261.8→290.1 | 4.80                 |
| GM <sub>3</sub> (42:1) | 1263.8→290.1 | 5.30                 |

MRM, multiple reaction monitoring

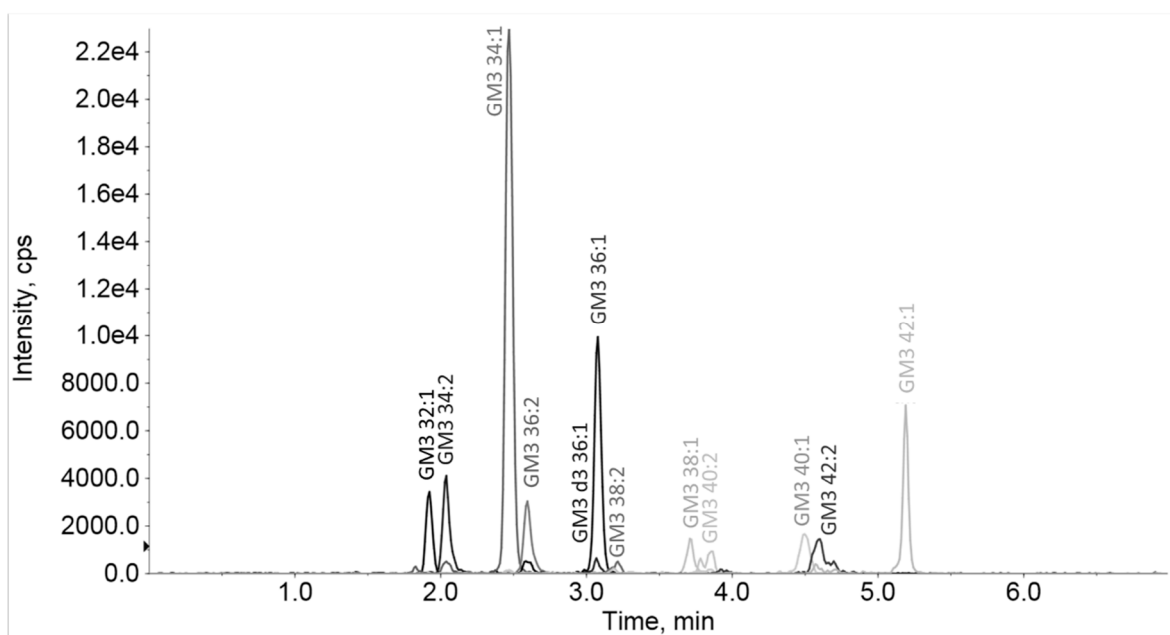

Figure S1. Chromatogram illustrating a participant's MS results

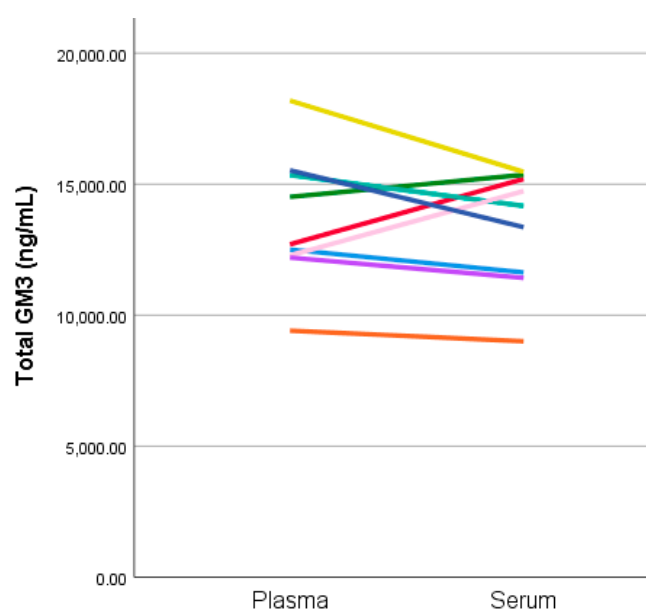

**Figure S2.** Individual participant differences in total GM3 (mg/mL) between serum and plasma samples (samples at 3 months, T0, -20°C)

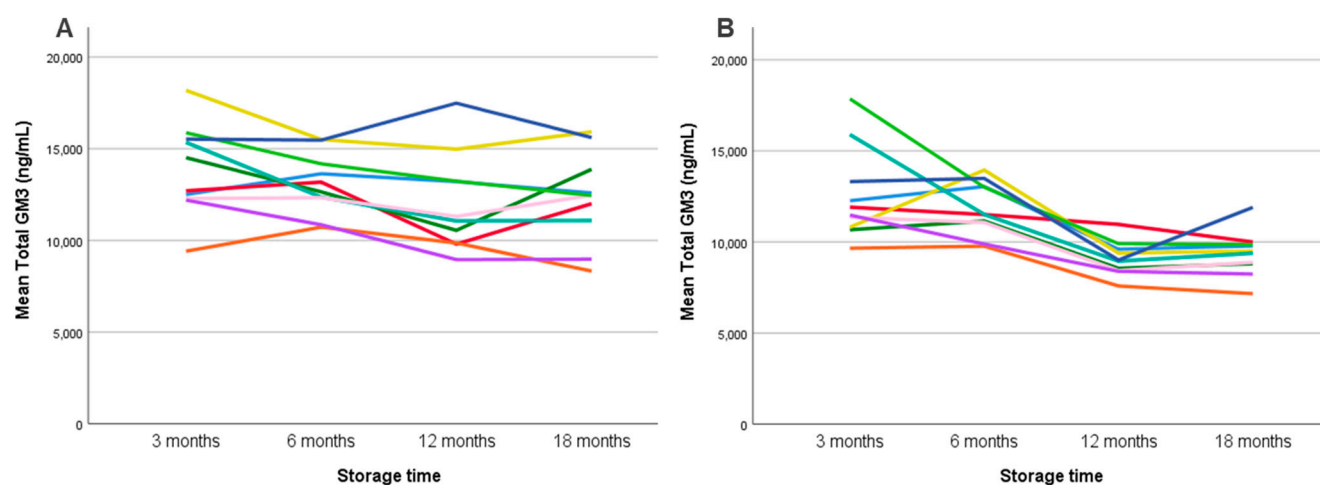

**Figure S3.** Individual participant changes in plasma total GM3 gangliosides stored over time at -20°C (A) and -70°C (B)

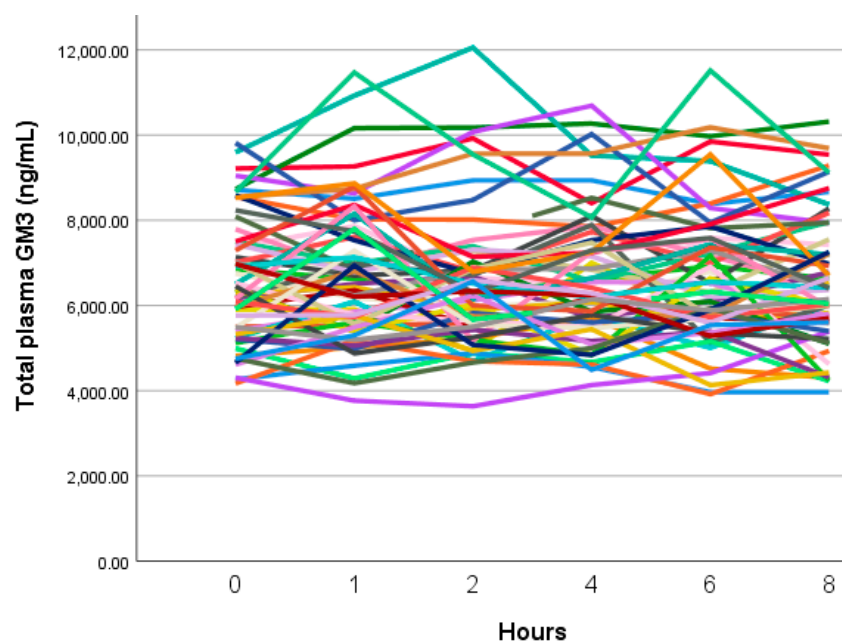

Figure S4. Changes in individual participant's total plasma GM3 concentrations over 8 hours (visit 2)

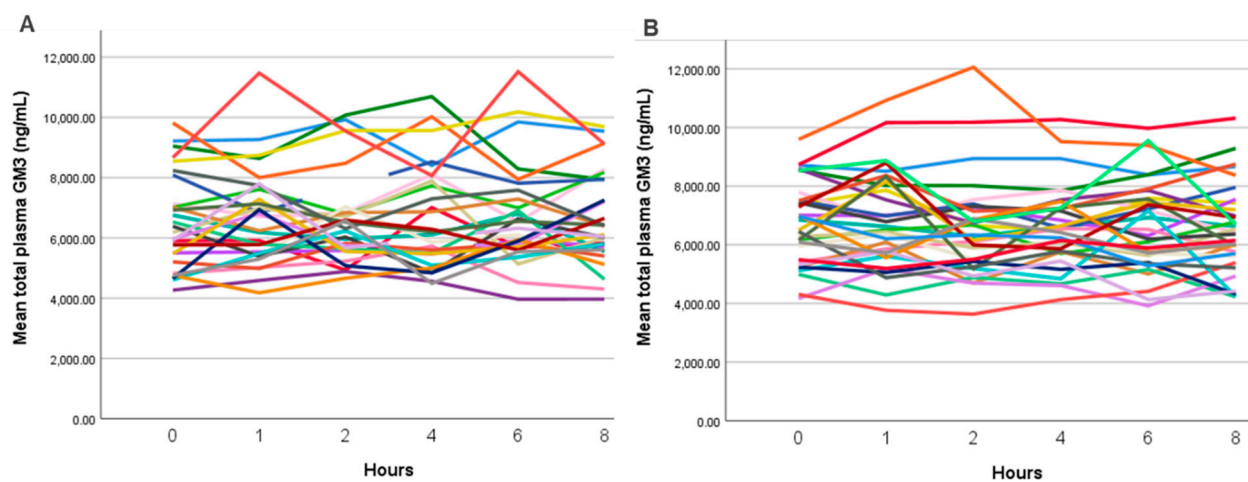

**Figure S5.** Changes in individual participant's total plasma GM3 concentrations over 8 hours after consumption of either high- (A, n=29) or low (B, n=32) ganglioside meals (visit 3)
